# Supplementary material
Source: PubMed Central journal article supplement (PMC5898400)
Supplement: NIHMS931394-supplement-SI.pdf [file NIHMS931394-supplement-SI.pdf]

# ADVANCED FUNCTIONAL MATERIALS

## Supporting Information

for *Adv. Funct. Mater.*, DOI: 10.1002/adfm.201703726

### Ice-Templated Protein Nanoridges Induce Bone Tissue Formation

*Mingying Yang,\* Yajun Shuai, Kegan S. Sunderland, and Chuanbin Mao\**

## Supporting Information

## Ice-templated protein nanoridges induce bone tissue formation

Mingying Yang\*, Yajun Shuai, Kegan S. Sunderland and Chuanbin Mao\*

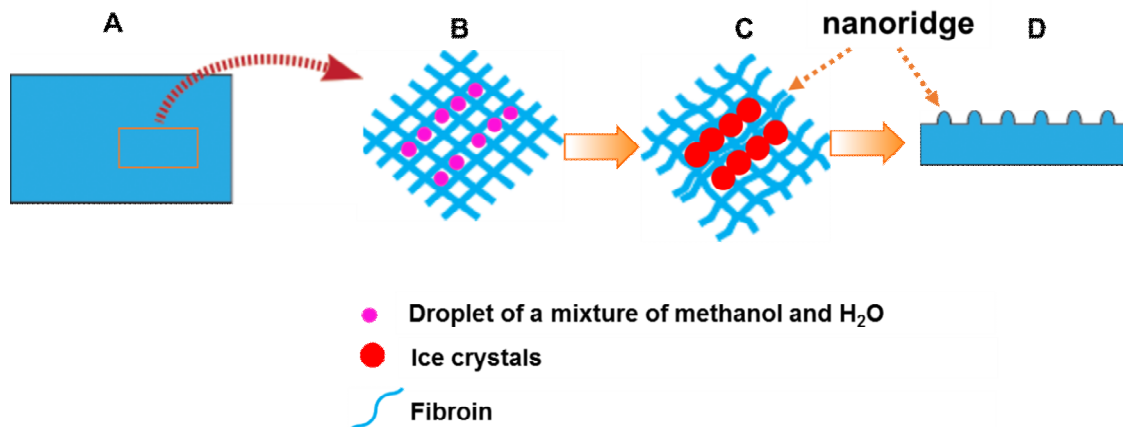

**Figure S1.** Schematic illustration showing the possible mechanism of the nanoridge formation on the film surface. (A) The film surface, which is made of silk fibroin, is treated to become hydrophobic by methanol and then immersed in H<sub>2</sub>O. (B) The aqueous droplets (Figure S2B) in the resultant film tend to be spherical due to the hydrophobic nature of the film. (C) After the water is frozen into ice, the volume expansion pushes the surrounding silk fibroin to be aggregated into a nanoridge. (D) The side view of C.

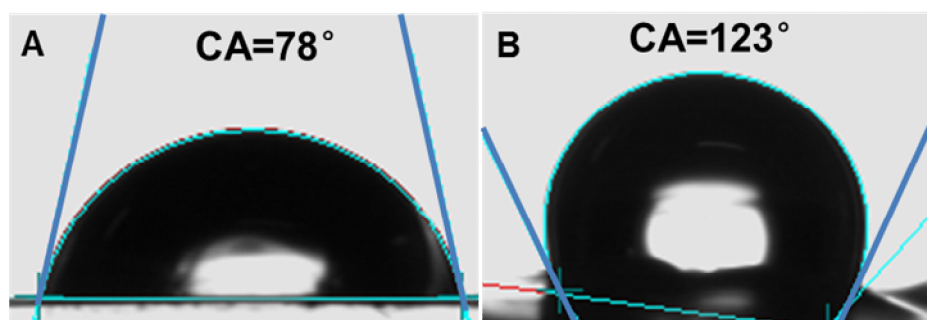

**Figure S2.** Contact angle (CA) measurements of the SF film before (A) and after (B) being treated by methanol (B).
